## Addendum

## Addendum: Analysis of pituitary adenoma expression patterns suggests a potential role for the NeuroD1 transcription factor in neuroendocrine tumor-targeting therapies

Lubov Borisovna Mitrofanova<sup>1</sup>, Olga Mikhailovna Vorobeva<sup>1</sup> and Andrey Nikolaevich Gorshkov<sup>1,2</sup>

<sup>1</sup>Almazov National Medical Research Center, St. Petersburg, Russia

<sup>2</sup>Smorodintsev Research Institute of Influenza, St. Petersburg, Russia

**Published:**

**Copyright:** © 2023 Mitrofanova et al. This is an open access article distributed under the terms of the [Creative Commons Attribution License](#) (CC BY 3.0), which permits unrestricted use, distribution, and reproduction in any medium, provided the original author and source are credited.

**This article has an addendum:** All examined patients gave informed voluntary consent. This research was approved by the Ethics Committee of the Almazov National Medical Research Centre (protocol #49, 12 March 2018) and complied with the Helsinki Declaration.

Original article: Oncotarget. 2019; 10:289–312. <https://doi.org/10.18632/oncotarget.26513>
